# Supplementary material
Source: Royal Society of Chemistry journal article supplement (doi:10.1039/d6nj00822d)
Supplement: d6nj00822d1.pdf [file d6nj00822d1.pdf]

## Supporting Information

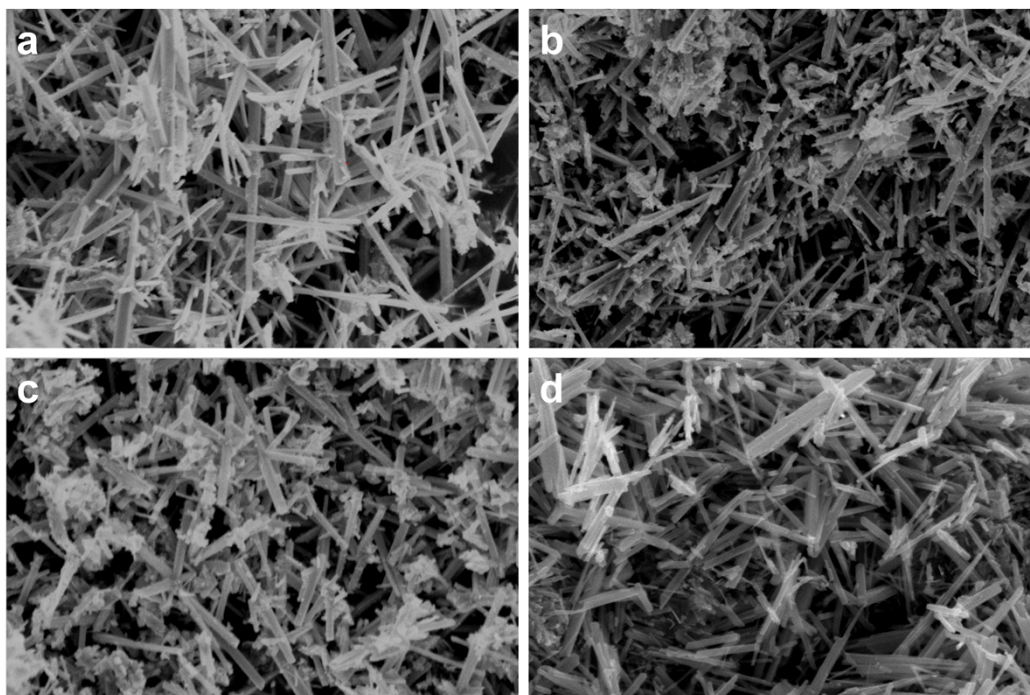

Figure S1. SEM images of OMS-La, OMS-Gd, OMS-Lu and OMS.

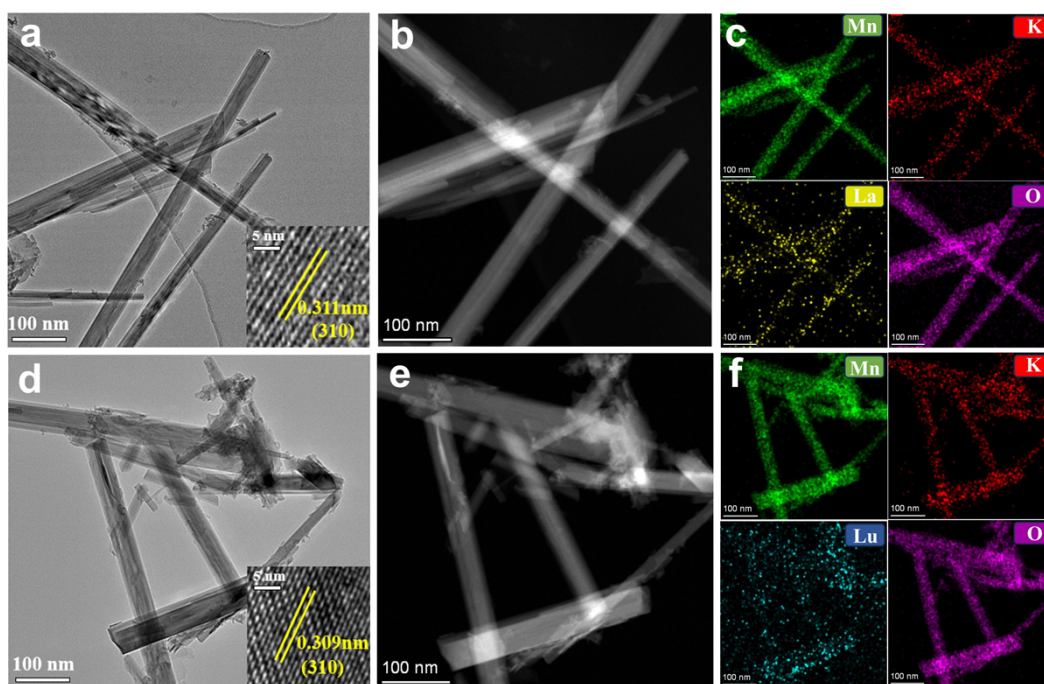

Figure S2. OMS-La: a) TEM image (illustrated by lattice fringe diagram) and b,c) mapping image. OMS-Lu: d) TEM image(illustrated by lattice fringe diagram) and e,f) mapping image.

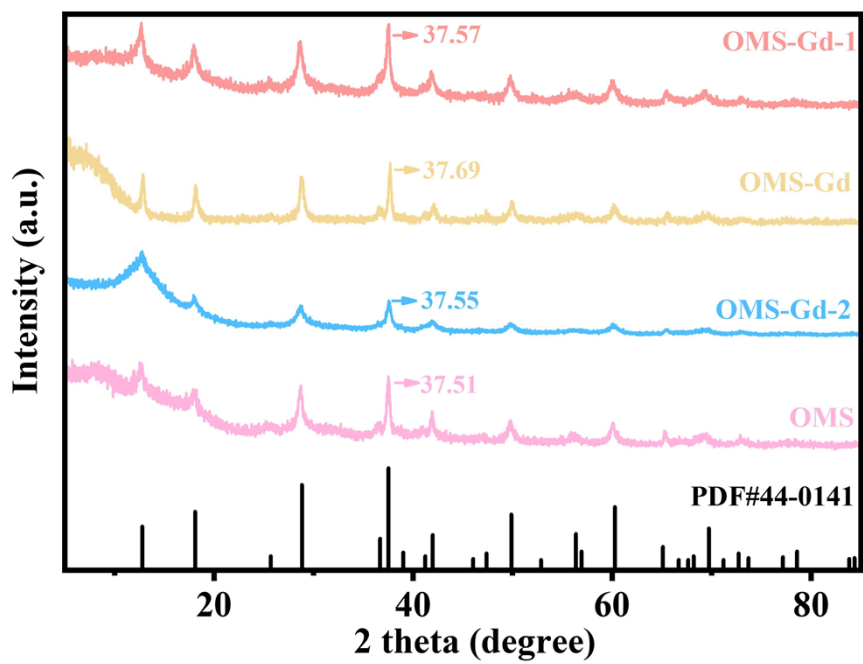

Figure S3. XRD patterns of OMS doped with different gadolinium ion contents

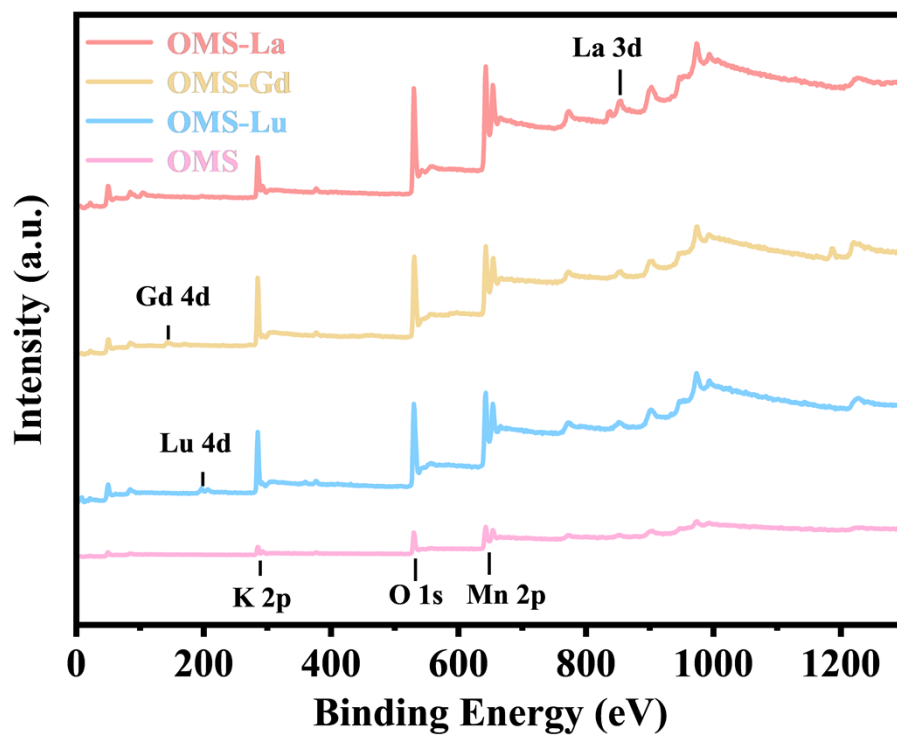

Figure S4. XPS full spectrum of OMS and other lanthanide doped catalysts.

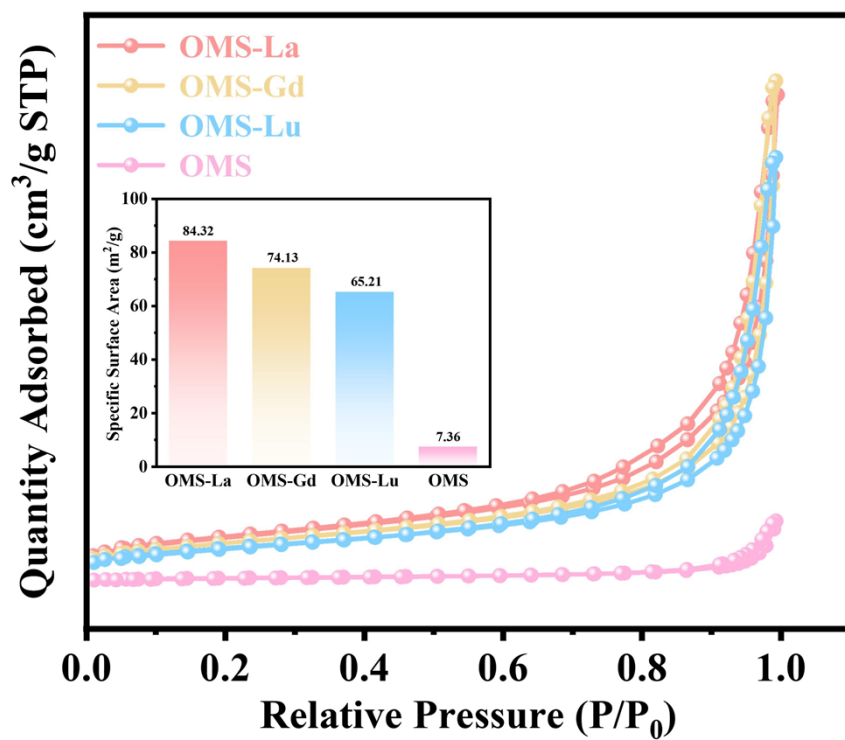

Figure S5. The specific surface area of OMS-La, OMS-Gd, OMS-Lu and OMS (The illustration is a statistical diagram of specific surface area).

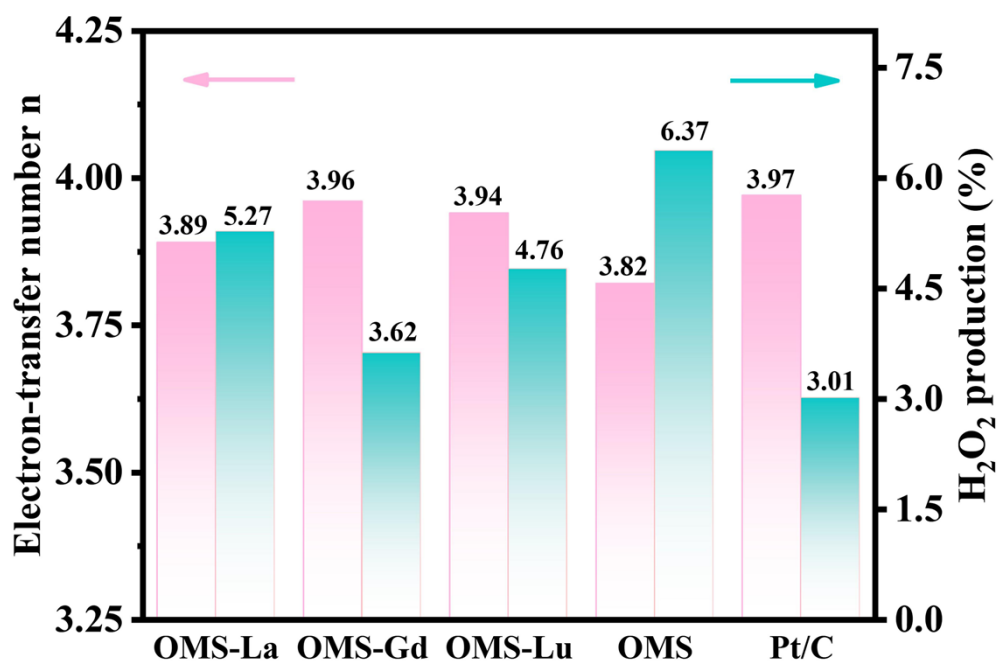

Figure S6. Columnar diagram of electron transfer number and H<sub>2</sub>O<sub>2</sub> yield.

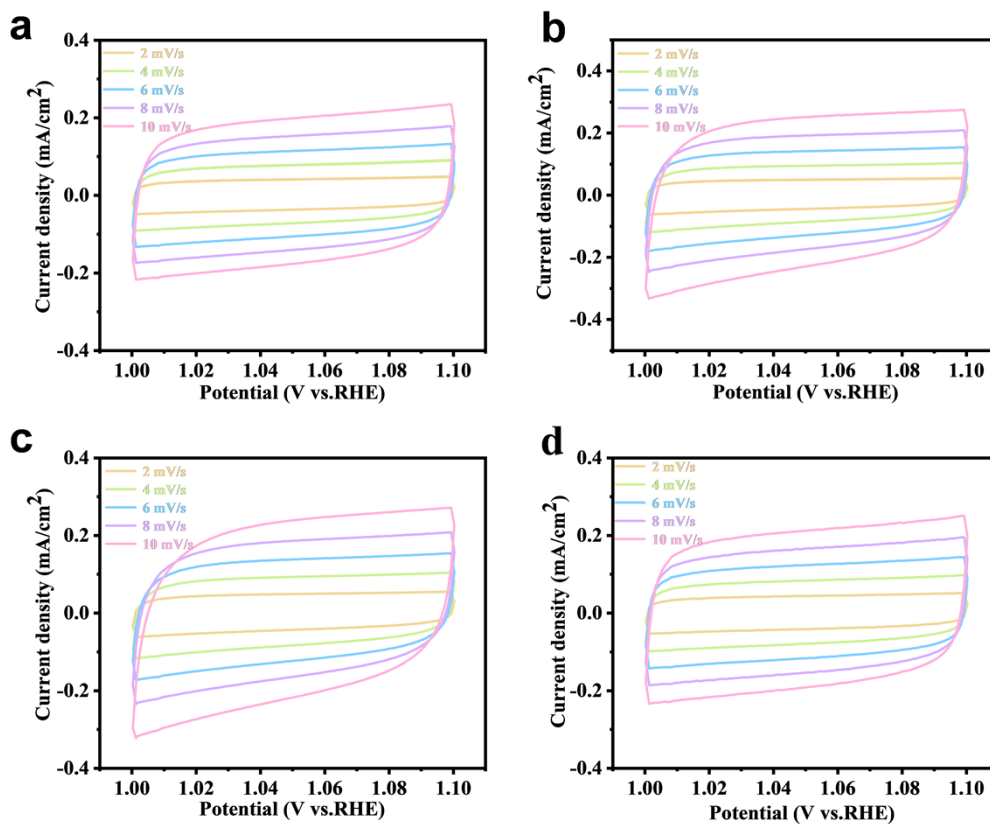

Figure S7. Cyclic voltammograms plots at different scanning rates of a) OMS-La, b) OMS-Gd, c) OMS-Lu, and d) OMS.

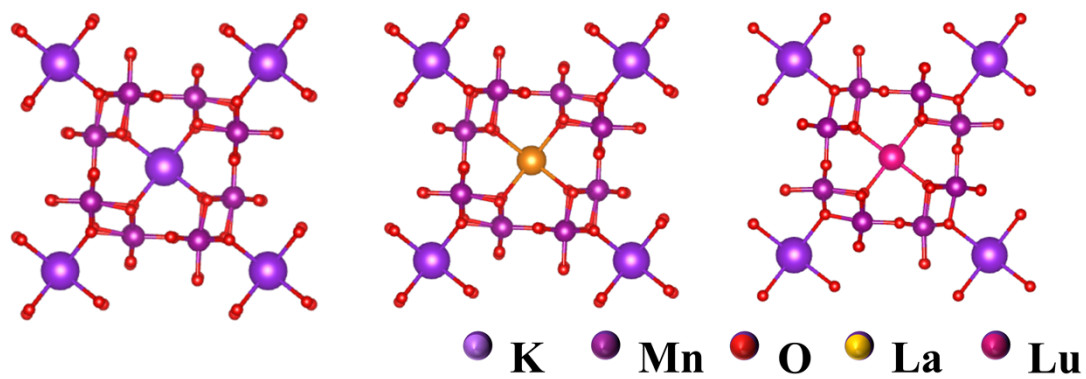

Figure S8. The theoretical models of OMS, OMS-La and OMS-Lu.

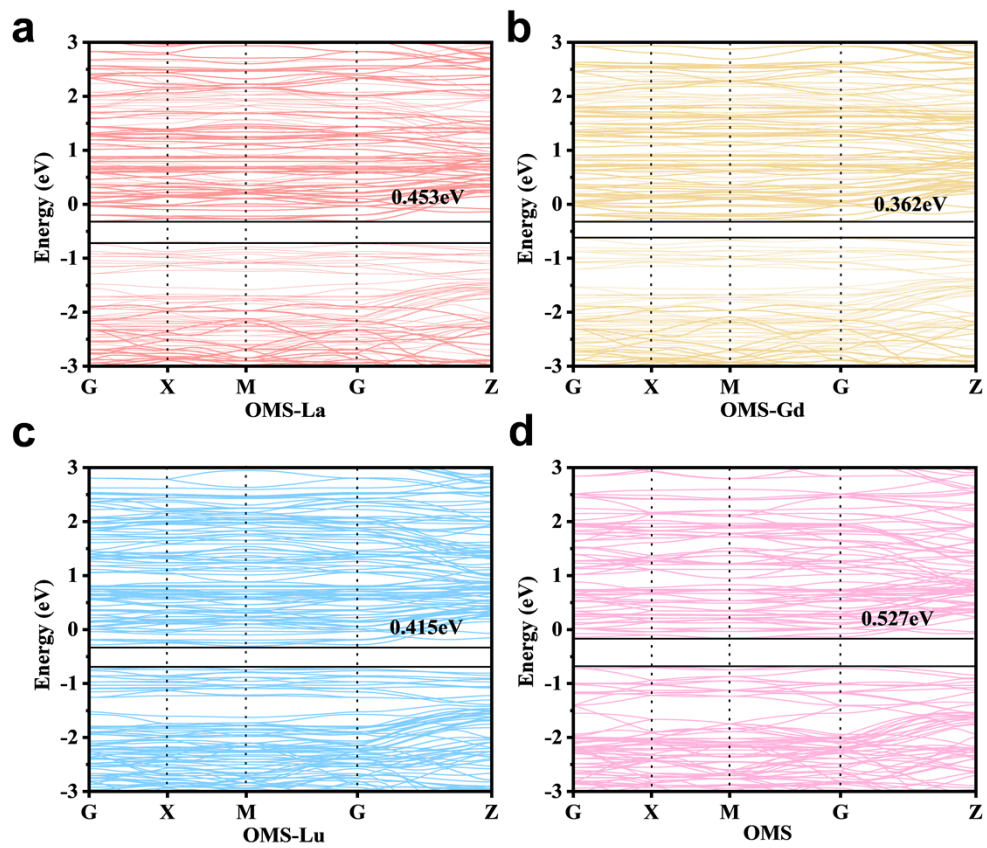

Figure S9. The schematic diagram of band gap.

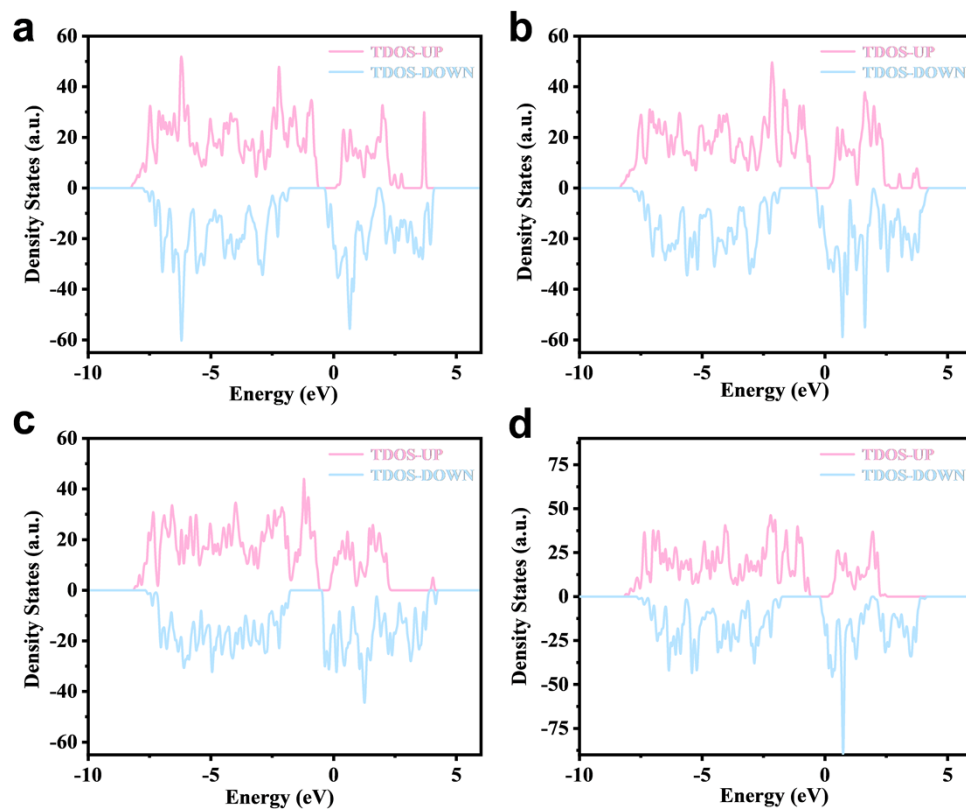

Figure S10. TDOS of a) OMS-La, b) OMS-Gd, c) OMS-Lu and d) OMS-2.

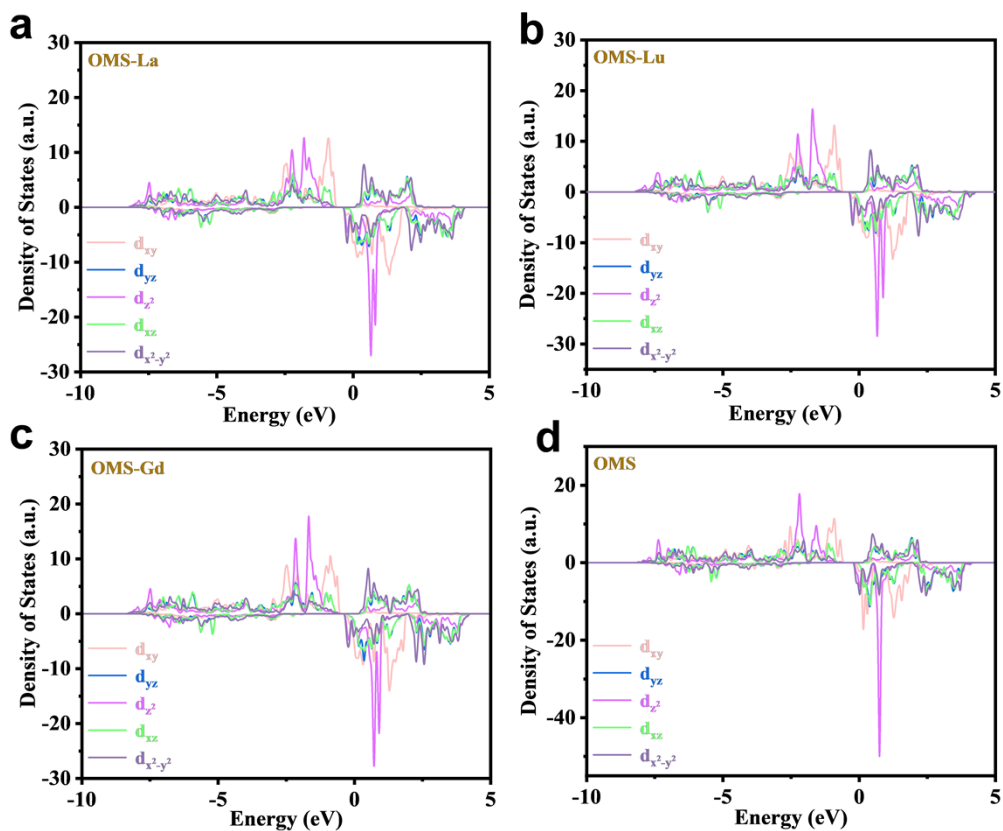

Figure S11. Mn PDOS of a) OMS-La, b) OMS-Gd, c) OMS-Lu and d) OMS.

Table S1. The atomic ratio of sample elements in the catalyst as determined by ICP testing(X denotes lanthanide metal ions).

| Catalyst | K:Mn    | X:Mn    |
|----------|---------|---------|
| OMS-La   | 0.146:1 | 0.076:1 |
| OMS-Gd   | 0.126:1 | 0.013:1 |
| OMS-Lu   | 0.128:1 | 0.018:1 |
| OMS      | 0.178:1 |         |

Table S2. The relative contents of Mn<sup>3+</sup> and Mn<sup>4+</sup> in OMS-Gd were calculated.

| Catalyst | Mn <sup>3+</sup> Contents(%) | Mn <sup>4+</sup> Contents(%) |
|----------|------------------------------|------------------------------|
| OMS-La   | 40                           | 60                           |
| OMS-Gd   | 57                           | 43                           |
| OMS-Lu   | 44                           | 56                           |
| OMS      | 32                           | 68                           |

Table S3. The calculation of electron occupation number of eg orbital d<sub>z</sub><sup>2</sup> energy level and d<sub>x</sub><sup>2-y</sup><sup>2</sup> energy level of four catalysts.

|                                            | OMS-La (eV) | OMS-Gd (eV) | OMS-Lu (eV) | OMS (eV) |
|--------------------------------------------|-------------|-------------|-------------|----------|
| d <sub>x</sub> <sup>2-y</sup> <sup>2</sup> | 0.139       | 0.162       | 0.145       | 0.133    |
| d <sub>z</sub> <sup>2</sup>                | 0.214       | 0.228       | 0.218       | 0.209    |

Table S4. The calculation results of d<sub>x</sub><sup>2-y</sup><sup>2</sup> energy level and d<sub>z</sub><sup>2</sup> energy level in e<sub>g</sub> orbit of four catalysts.

|                                            | OMS-La (eV) | OMS-Gd (eV) | OMS-Lu (eV) | OMS (eV) |
|--------------------------------------------|-------------|-------------|-------------|----------|
| d <sub>x</sub> <sup>2-y</sup> <sup>2</sup> | -2.09       | -2.06       | -2.08       | -2.22    |
| d <sub>z</sub> <sup>2</sup>                | -2.67       | -2.64       | -2.65       | -2.77    |

Table S5. Comparison of some recently reported ORR electrocatalysts performance.

| Catalyst                                  | ORR $E_{1/2}$ (V) | Reference                                 |
|-------------------------------------------|-------------------|-------------------------------------------|
| OMS-Gd                                    | 0.83              | This work                                 |
| CCSO/NC-2                                 | 0.75              | Adv. Mater. 2023, 35, 2303488.            |
| NIS/NiFe <sub>2</sub> O <sub>4</sub>      | 0.81              | Adv. Mater. 2022, 34, 2110172.            |
| Ir@Co <sub>3</sub> O <sub>4</sub>         | 0.75              | Adv. Funct. Mater. 2022, 32, 2111989.     |
| CoxP@NP-C                                 | 0.82              | Angew. Chem. Int., Ed. 2020, 59, 21360.   |
| P-NCO/NCN-CF@CC                           | 0.83              | Adv. Funct. Mater. 2023, 33, 2302883.     |
| CoP/CoO@MNC-CNT                           | 0.838             | Small. 2023, 19, 2206341.                 |
| Ce <sub>0.05</sub> -N-C/Cu <sub>clu</sub> | 0.79              | Adv. Funct. Mater. 2025, e15095.          |
| EuCo-NC                                   | 0.824             | J. Electroanal. Chem. 2025, 983, 119031.  |
| (a+δ)-Mn11                                | 0.726             | Catal. Sci. Technol. 2020, 10, 7352–7364. |
| ACMO                                      | 0.81              | Chem sus chem. 2022, 15, e202200612.      |
| Hollow α-MnO <sub>2</sub>                 | 0.80              | Inorg. Chem. Commun. 2022, 146, 110143.   |
| NiFeMn                                    | 0.81              | J. Energy Storage. 2023, 74, 109350.      |
| U-MnO <sub>2</sub> /PSNC                  | 0.814             | Ceram. Int. 2022, 48, 6506–6511.          |
